# Supplementary material for: Transthyretin Amyloid Cardiomyopathy: Impact of Transthyretin Amyloid Deposition in Myocardium on Cardiac Morphology and Function
Source: MDPI journal article supplement (doi:10.3390/jpm12050792), 2022-05-13
Supplement: s1 [file s1]

## Supplementary Materials

### Text S1. Immunohistochemistry protocol for 8-hydroxy-2'-deoxyguanosine using human cardiac tissue specimens.

Human cardiac tissue specimens were fixed with 10% buffered formalin, embedded in paraffin, and sectioned at 4- $\mu$ m thickness. After deparaffinization and hydration, the tissues were blocked with Tris-buffered saline with Tween-20 (TBST) containing 4% normal donkey serum (Sigma-Aldrich, St. Louis, MO, USA) and 2% bovine serum albumin for 1 h. The tissues were incubated with anti-8-hydroxy-2'-deoxyguanosine (8-OHdG) antibody (ab48508, 1:200 dilution; Abcam, Cambridge, United Kingdom) at 4°C overnight. Histofine Simple Stain Max PO (M) (424131, Nichirei, Tokyo, Japan) was used as the secondary antibody, and diaminobenzidine (Simple Stain DAB Solution, 425011, Nichirei, Tokyo, Japan) was used as a chromogenic substrate. All sections were counterstained with hematoxylin.

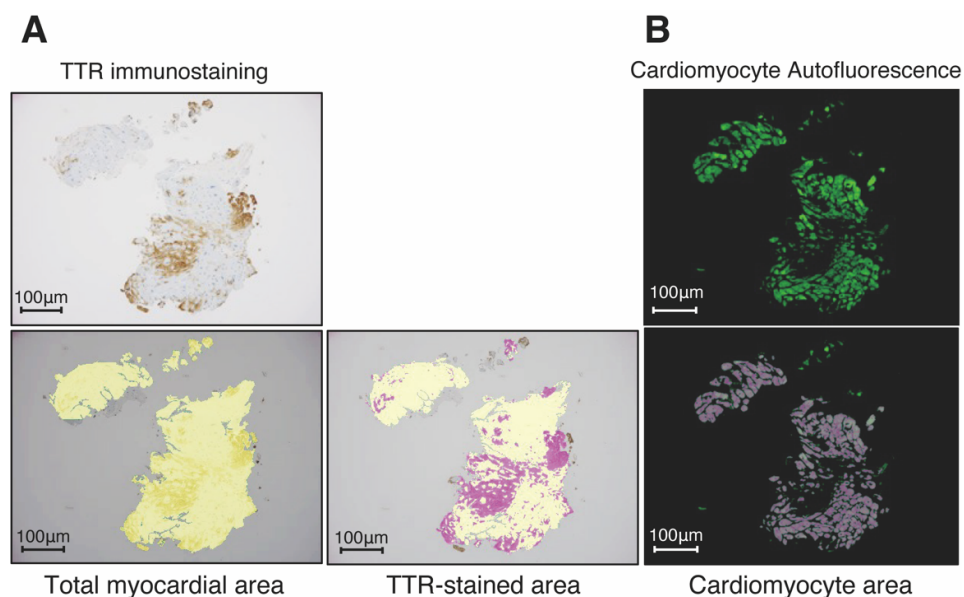

**Figure S1.** Images of TTR immunostaining and autofluorescence in patients with ATTR-CM. (A) The total myocardial area and TTR-stained area were measured using TTR immunostaining. (B) Cardiomyocyte autofluorescence was used to measure cardiomyocyte area. ATTR-CM, transthyretin amyloid cardiomyopathy; TTR, transthyretin.

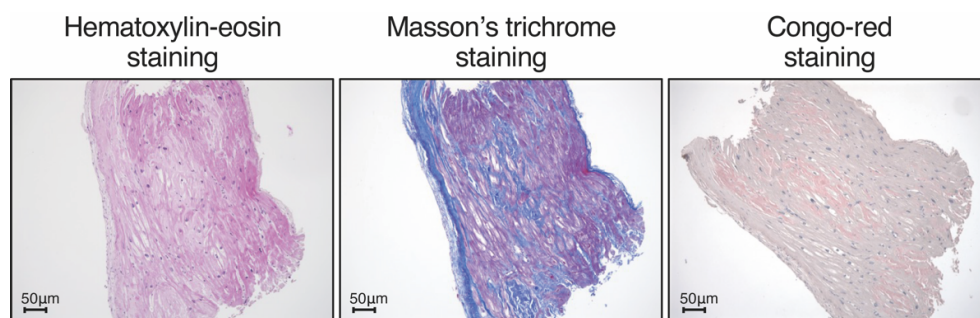

**Figure S2.** General staining of endomyocardial biopsy specimens of patients with ATTR-CM. Endomyocardial biopsy specimens of patients with ATTR-CM were stained using hematoxylin-eosin, Masson's trichrome, and Congo red staining. ATTR-CM, transthyretin amyloid cardiomyopathy.

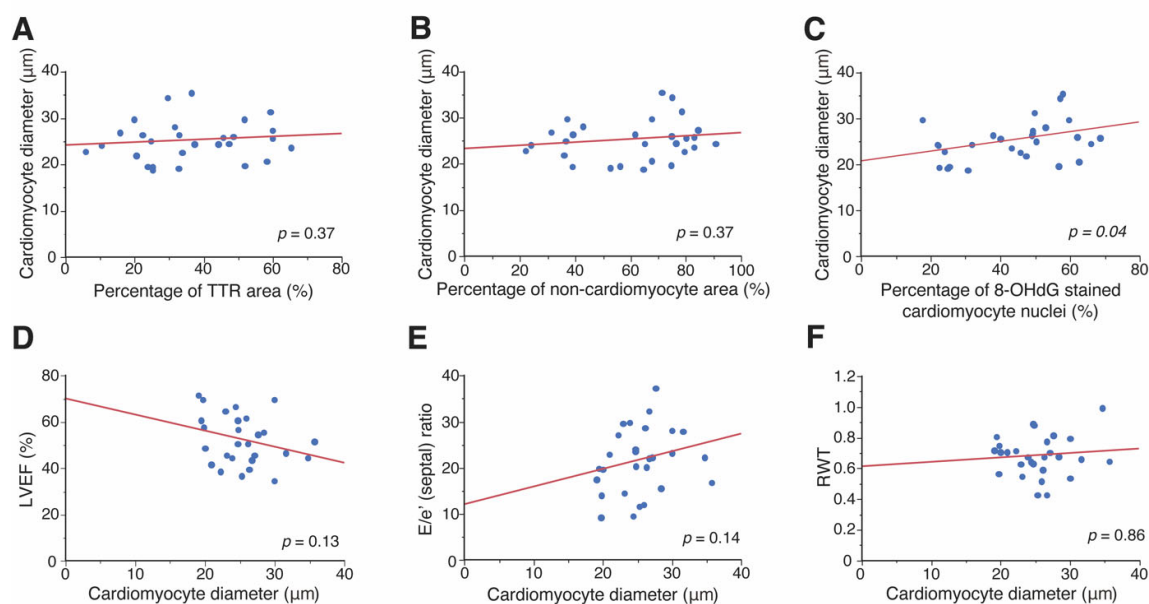

**Figure S3.** Association of cardiomyocyte diameter and pathological and echocardiographic features in patients with ATTR-CM. The relationship between cardiomyocyte diameter and (A) percentage of TTR area, (B) percentage of non-cardiomyocyte area, (C) percentage of 8-OHdG stained cardiomyocyte nuclei, (D) LVEF, (E) E/e' (septal) ratio, and (F) RWT. ATTR-CM, transthyretin amyloid cardiomyopathy; E/e' (septal) ratio, early transmitral filling velocity (E)/peak early diastolic velocity of septal mitral annulus (e') ratio; LVEF, left ventricular ejection fraction; 8-OHdG, 8-hydroxy-2'-deoxyguanosine; RWT, relative wall thickness; TTR, transthyretin.
